# Supplementary material
Source: PubMed Central journal article supplement (PMC4136615)
Supplement: 1407716111_pnas.201407716SI.pdf [file 1407716111_pnas.201407716SI.pdf]

# Supporting Information

Guo and Sun 10.1073/pnas.1407716111

## SI Text

### Spin Transport Through the Single-Stranded DNA in the Presence of Twist Angle Disorder

Fig. S1 *A* and *B* show, respectively, the spin-up conductance  $G_{\uparrow}$  and the spin polarization  $P_s$  for the single-stranded DNA (ssDNA) in the presence of the twist angle disorder, which can be traced back to the distorted ssDNA structure. Here, the twist angle disorder may be modeled by considering the rigid sugar-phosphate backbone where both the radius  $R$  and the nearest neighbor (NN) distance  $l_1$  are fixed (1, 2). Then, the twist angle  $\Delta\varphi_n$  between the  $n$ th and  $n + 1$ th nucleobases is distributed in the range  $[\Delta\varphi - D/2, \Delta\varphi + D/2]$  randomly and uniformly, with  $\Delta\varphi$  the twist angle of the regular *B*-form structure and  $D$  the disorder strength. It is clear that when there exists the twist angle disorder, each nucleobase will fluctuate randomly from its equilibrium position. As a result, the ssDNA deviates from the

*B*-form structure and the helicity of the ssDNA can somewhat be destroyed. One can see from Fig. S1*B* that the ssDNA cannot be a spin filter with the order of magnitude of the spin polarization being  $10^{-5}$ , no matter whether the twist angle disorder is considered or not.

### Spin Selectivity of the Peptide in the Region of Weak Spin-Orbit Coupling

To clearly illustrate the magnitude of the spin-orbit coupling (SOC) at which the spin-filtering effect of the peptide is still pronounced, Fig. S2*A* plots  $P_s$  for different renormalized NN SOC  $s_1$  and Fig. S2*B* displays the averaged spin polarization  $\langle P_s \rangle$  vs.  $s_1$ . It clearly appears that the spin selectivity of the peptide remains significant in the region of very weak SOC. For instance, the spin polarization can reach the value 6.4%, 10.6%, 14.2%, 27.6%, 33.7%, and 37.1% by increasing  $s_1$  from  $0.004t_1$  to  $0.07t_1$  (see Fig. S2*A*).

1. Gore J, et al. (2006) DNA overwinds when stretched. *Nature* 442(7104):836–839.

2. Guo AM, Sun QF (2012) Spin-selective transport of electrons in DNA double helix. *Phys Rev Lett* 108(21):218102.

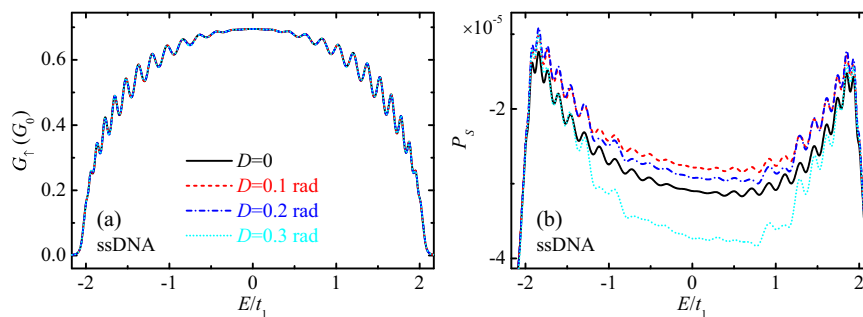

Fig. S1. Spin transport property of the ssDNA in the presence of the twist angle disorder. (A) Energy-dependent spin-up conductance  $G_{\uparrow}$  and (B) spin polarization  $P_s$  for various strengths of the twist angle disorder. Here,  $G_0 = e^2/h$  is the quantum conductance. The model parameters are  $N = 30$ ,  $s_1 = 0.12t_1$ ,  $l_c = 0.9 \text{ \AA}$ , and  $\Gamma_d = 0.06t_1$ . The results are calculated from a single disorder configuration and are similar for other disorder configurations.

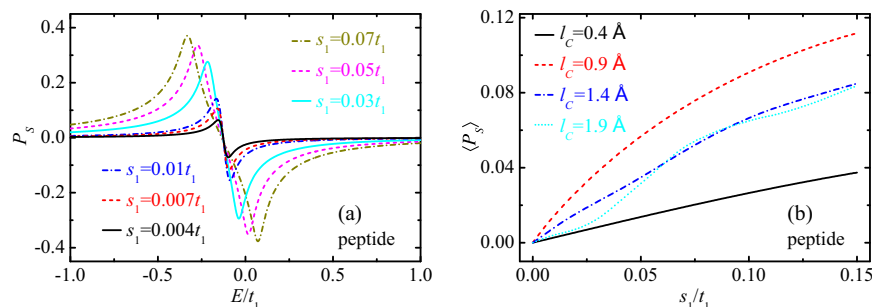

Fig. S2. Spin filtration efficiency of the peptide for various SOC strengths. (A) Energy-dependent spin polarization  $P_s$  with several values of the renormalized NN SOC  $s_1$ . The model parameters are  $N = 60$ ,  $l_c = 0.9 \text{ \AA}$ , and  $\Gamma_d = 0.06t_1$ . (B) Averaged spin polarization  $\langle P_s \rangle$  vs.  $s_1$  for various decay exponent  $l_c$  with  $N = 60$  and  $\Gamma_d = 0.06t_1$ .
